1 **Frailty and comorbidity in predicting community COVID-19 mortality in the UK**

2 **Biobank: the effect of sampling**

3

4 Jonathan K. L. Mak<sup>1\*</sup>, Ralf Kuja-Halkola<sup>1</sup>, Yunzhang Wang<sup>1</sup>, Sara Hägg<sup>1</sup>, Juulia Jylhävä<sup>1</sup>

5

6 <sup>1</sup> Department of Medical Epidemiology and Biostatistics, Karolinska Institutet, Stockholm,

7 Sweden

8

9 **\*Corresponding author**

10 Jonathan K. L. Mak

11 Department of Medical Epidemiology and Biostatistics, Karolinska Institutet, Nobels väg 12A,

12 171 65 Stockholm, Sweden

13 Email: jonathan.mak@ki.se

14

15 **Word count:** Abstract: 244; Main text: 3164

16 **Abstract**

17 Frailty has been linked to an increased risk of coronavirus disease 2019 (COVID-19)-associated  
18 mortality, but evidence has been inconclusive and limited to hospitalized older individuals.  
19 Using data from the UK Biobank, we assessed whether frailty and comorbidity predict COVID-  
20 19 mortality in the overall community population ( $n=437,555$ ) and in a selected COVID-19  
21 positive sample ( $n=2,059$ ). Frailty was assessed using the Rockwood Frailty Index (FI) and the  
22 Hospital Frailty Risk Score (HFRS), whereas comorbidity was assessed by the Charlson  
23 Comorbidity Index (CCI). Overall, 408 individuals died of COVID-19, as ascertained from the  
24 death register data. In the full sample, HFRS (odds ratio [OR] 1.07; 95% confidence interval [CI]  
25 1.06–1.07) and CCI (OR 1.14; 95% CI 1.08–1.20) were associated with increased risk of COVID-  
26 19 mortality, while FI was not statistically significantly different from null in the multivariable  
27 logistic regression model. Adding HFRS or CCI to a model with only age and sex resulted in  
28 significantly larger areas under the receiver operating characteristic curves. Nevertheless,  
29 when restricting the analyses to COVID-19 positive cases, which is a sample with over-  
30 representation of frail individuals, neither of the frailty measures or CCI added meaningful  
31 predictive accuracy on top of age and sex. Besides, we observed stronger associations  
32 between HFRS categories and COVID-19 mortality in relatively younger (<75 years) than older  
33 individuals ( $\geq 75$  years). Our results suggest that HFRS and CCI, which could be readily derived  
34 from medical records, may be useful for COVID-19 mortality risk stratification in the  
35 community.

36

37 **Keywords:** COVID-19, mortality, frailty, comorbidity, ageing

## 38 Introduction

39 Coronavirus disease 2019 (COVID-19), caused by the severe acute respiratory syndrome  
40 coronavirus 2 (SARS-CoV-2), has led to a global pandemic, affecting more than 41 million  
41 individuals and causing ~1.1 million deaths worldwide as of 22<sup>nd</sup> October 2020 [1].  
42 Accumulating evidence has shown that older age, male sex, comorbidities (e.g. diabetes,  
43 hypertension), social deprivation, black ethnicity, and laboratory indicators such as elevated  
44 levels of d-dimer and interleukin 6 are risk factors for mortality associated with COVID-19 [2–  
45 6]. However, there are relatively few data available for risk stratification in community  
46 samples compared to hospitalized patients.

47 Frailty, characterized as a state of increased vulnerability due to cumulative decline in  
48 multiple physiological systems [7], has consistently shown to be a strong predictor of mortality  
49 in the general population [8–10]. Various tools have been developed for measuring frailty.  
50 Some of which require assessment by physicians, such as the Clinical Frailty Scale (CFS) [11],  
51 which is more suitable in clinical settings. Another widely used measure is the Rockwood  
52 frailty index (FI), which is defined as a ratio of accumulated deficits over the total number of  
53 deficits considered [12]. The Hospital Frailty Risk Score (HFRS), constructed based on *the*  
54 *International Statistical Classification of Diseases and Related Health Problems, Tenth Revision*  
55 (ICD-10) coding system [13], was developed for frailty risk stratification among older  
56 hospitalized patients and has been validated for its ability to predict adverse outcomes in  
57 various settings [14,15].

58 A growing number of studies have investigated the association between frailty,  
59 frequently measured using the CFS in hospital settings, and mortality among COVID-19  
60 patients, but findings remain inconclusive. While there is evidence that frailty may add to the  
61 risk prediction in hospitalized patients [16–19], some studies have observed weak [20,21], or

62 even null associations [22]. Heterogeneity in the prior results may partly be owing to the  
63 COVID-19 patients being a non-random, selected sample with a particularly high prevalence  
64 of frailty [23], potentially causing selection bias [24]. With the continuing spread of the SARS-  
65 CoV-2 across the world, it is of importance to assess whether COVID-19 mortality can be  
66 predicted using other frailty and comorbidity measures, such as the HFRS and CCI that can be  
67 readily derived from medical records, in community samples.

68 Using a large population cohort from the UK Biobank study, we aimed to investigate  
69 the predictive ability of frailty, measured using the HFRS and FI, and the Charlson Comorbidity  
70 Index (CCI) as a measure of comorbidity, for COVID-19 mortality among (a) the overall  
71 community population and (b) COVID-19 positive individuals. Our goal was to assess whether  
72 an easily accessible frailty and/or comorbidity measure could aid in COVID-19 mortality risk  
73 stratification in community settings. In keeping with the observations that higher levels frailty  
74 carry a relatively greater risk of all-cause mortality in younger than older ages [9,10,25], we  
75 additionally assessed whether the same holds true for COVID-19 mortality. As excess mortality  
76 due to COVID-19 may be more pronounced in younger and fitter individuals compared to old  
77 and frail [22], it is essential to identify the factors contributing to this risk.

78

## 79 **Methods**

### 80 *Study population*

81 This is a population-based cohort study using data from the UK Biobank. Between 2006 and  
82 2010, more than 500,000 participants completed a touch-screen questionnaire, had physical  
83 measurements taken, and provided biological samples at one of the 22 assessment centres in  
84 England, Wales or Scotland [26]. The UK Biobank study was approved by the North West Multi-

85 Centre Research Ethics Committee. All participants provided written informed consent for  
86 data collection, analysis, and record linkage.

87 We excluded participants who died before 1<sup>st</sup> March 2020, requested to withdraw  
88 from the study prior to August 2020, and had missing data on frailty and comorbidity measures.  
89 This resulted in a sample size of  $n=437,555$ , which we referred to as the “full sample”. The  
90 subgroup of “COVID-19 positive sample” ( $n=2,059$ ) consisted of those being tested positive,  
91 diagnosed as COVID-19 patients in hospitals, and/or died of COVID-19. Analyses were  
92 performed in both samples (**Fig. 1**).

93

#### 94 *COVID-19 diagnosis and mortality*

95 Information on COVID-19 was obtained from three data sources linked to UK Biobank:  
96 laboratory test results, inpatient medical records, and death register. SARS-CoV-2 PCR test  
97 results were provided by Public Health England [27], with data available in England only,  
98 between 16<sup>th</sup> March and 24<sup>th</sup> August 2020. Hospital inpatient data were sourced from the  
99 Hospital Episode Statistics (HES), containing electronic medical records (i.e., ICD-10 diagnostic  
100 codes) for all hospital admissions to National Health Service (NHS) hospitals in England up to  
101 30<sup>th</sup> June 2020. Death register data included all deaths up until 24<sup>th</sup> August 2020 in England,  
102 Wales and Scotland, containing ICD-10 codes assigned as individuals’ primary and contributory  
103 causes of death.

104 Participants were considered “COVID-19 positive” when meeting at least one of the  
105 following criteria: (i) being positive in at least one of the PCR tests; (ii) shown as COVID-19  
106 inpatients, with ICD-10 code U07 in hospital admission; and (iii) died of COVID-19, defined as  
107 those with COVID-19 (ICD-10 code U07) as the primary or contributory causes of death.  
108 COVID-19 mortality was used as the main outcome in the analyses.

109           Among the COVID-19 positive individuals, we compared characteristics of those  
110 diagnosed as patients (i.e., with positive test result or was a COVID-19 inpatient;  $n=1,970$ ) and  
111 those died of COVID-19 but without positive test record ( $n=89$ ), and found that both groups  
112 were generally comparable except that individuals in the latter group were more likely to be  
113 older, with lower income and with higher HFRS (**Appendix Table S1**).

114

#### 115 *Frailty and comorbidity measures*

116 Frailty was assessed using the FI and HFRS, and comorbidity was measured using the CCI  
117 (timeline of data collection is shown in **Appendix Fig. S1**). The FI has previously been created  
118 and validated by us for the UK Biobank participants, using 49 self-reported frailty items  
119 assessed at baseline during 2006–2010 that cover a wide range of items for physical and  
120 mental well-being (**Appendix Table S2**) [10]. The FI was calculated as the sum of the items  
121 (deficits) present in an individual divided by the total number of deficits, for instance, an  
122 individual with 7 deficits from 49 items would receive an FI of  $7/49=0.14$ . The FI was used as  
123 both continuous and categorical variable, the latter being categorized into four groups:  
124 relatively fit ( $\leq 0.03$ ), less fit ( $>0.03-0.1$ ), least fit ( $>0.1-0.21$ ) and frail ( $>0.21$ ) [28]. HFRS and  
125 CCI were computed based on the ICD-10 codes from hospital records [13,29]. Only medical  
126 records before 1<sup>st</sup> March 2020 were included so that diagnoses due to or associated with  
127 COVID-19 would not bias the results. The HFRS was derived based on 109 frailty-related ICD-  
128 10 codes, as previously described by Gibert *et al* (**Appendix Table S3**) [13]. While it was  
129 originally developed for older individuals ( $\geq 75$  years) who had been admitted to hospital  
130 during the prior 2 years, we utilized all available ICD-10 codes for each individual for  
131 calculation. Each of the 109 codes were assigned a weight ranging from 0.1 to 7.1, depending  
132 on its strength of association with frailty. HFRS was then calculated by summing all the

133 weighted codes, and used both as continuous and categorical measures, the latter being  
134 categorized into low (<5), intermediate (5–15) and high (>15) risk of frailty [13]. Similarly, CCI  
135 was derived by summing weighted ICD-10 codes, based on 17 comorbidities with weights from  
136 1 to 6 depending on disease severity and mortality risk (**Appendix Table S4**) [29], and was  
137 treated as a continuous variable in all analyses. Individuals who had missing hospital data were  
138 those who had not been hospitalized or resided outside England (these data were only  
139 available for England). To maximize data utilization, we first excluded individuals who  
140 attended baseline assessment in Wales or Scotland and with missing hospital data, and then  
141 coded the remaining individuals with missing hospital data as 0 for HFRS and CCI. As a  
142 sensitivity analysis, we assessed whether including diagnoses from long ago would affect the  
143 results by calculating 2-year HFRS and CCI scores using diagnoses assigned only during the past  
144 two years (i.e., between 1<sup>st</sup> March 2018 and 29<sup>th</sup> February 2020). The FI, HFRS and CCI  
145 correlated moderately with each other (**Appendix Table S5**).

146

#### 147 *Other study variables*

148 Demographic characteristics (e.g. birth year, sex, ethnicity, smoking status) and  
149 socioeconomic indicators (e.g. education, income, Townsend deprivation index) were  
150 collected at baseline during 2006–2010. Education was assessed by the highest self-reported  
151 qualification and categorized into low (no relevant qualifications), intermediate (A levels, O  
152 levels/GCSEs, CSEs, NVQ/HND/HNC, other professional qualifications) and high (college or  
153 university degree). Annual household income was self-reported and categorized into four  
154 groups (<£18,000, £18,000–30,999, £31,000–51,999, ≥£52,000). Townsend deprivation index  
155 was derived from national census data regarding unemployment, car ownership, home

156 ownership, and household overcrowding; higher scores correspond to higher level of  
157 socioeconomic deprivation.

158

### 159 *Statistical analyses*

160 Descriptive statistics were calculated for the full sample and COVID-19 positive sample. Due  
161 to the apparent over-representation of frail individuals in the COVID-19 positive sample, we  
162 performed logistic regression to formally ascertain if frailty and comorbidity were  
163 determinants for being COVID-19 positive.

164 In both samples, multivariable logistic regression models were applied to investigate  
165 the associations of frailty and comorbidity (FI, HFRS, CCI, as continuous measures) with COVID-  
166 19 mortality, adjusted for age (as linear effect, after confirming that the age-mortality  
167 relationship was approximately linear) and sex. Ethnicity, smoking status, and socioeconomic  
168 variables were subsequently added into the models to test whether they had an effect on the  
169 associations. Areas under the receiver operating characteristic curves (AUROC) were used to  
170 assess the predictiveness of the different measures. Because the HFRS was originally designed  
171 for individuals older than 75 years and previous studies have reported age-varying risks for  
172 frailty [9,10,25], we additionally stratified the analysis by age <75 and ≥75 years, as well as  
173 performed an analysis with an interaction term between HFRS (continuous) and age group.

174 We further performed a series of sensitivity analyses to assess the robustness of our  
175 findings, which included (i) using categorical instead of continuous FI and HFRS variables; (ii)  
176 using 2-year HFRS and CCI, constructed by ICD-10 codes from the past 2 years only; and (iii)  
177 performing multinomial logistic regression models to account for non-COVID-19 deaths as  
178 competing risk, where mortality due to COVID-19 or other causes than COVID-19 were  
179 compared to those who were alive as of 24 August 2020.



180 To account for multiple comparisons, the Benjamini-Hochberg false discovery rate  
181 method was applied [30]. All analyses were performed using Stata v16.0 (Stata Corp, College  
182 Station, TX) and R v3.6.3 (R Foundation for Statistical Computing, Vienna, Austria).

183

## 184 **Results**

### 185 *Sample characteristics*

186 **Table 1** shows the characteristics of participants in the full sample and COVID-19 positive  
187 sample. In the full sample of 437,555 participants, the mean age as of the year 2020 was 68.1  
188 (standard deviation [SD] 8.1) and 55.3% were women. The proportions of men, Black ethnicity,  
189 previous or current smokers, low education, lowest income and most deprived groups were  
190 higher in the COVID-19 positive sample than the full sample. Frailty appeared to be over-  
191 represented among COVID-19 positive individuals, with 21.6% being “frail” (assessed by FI)  
192 and 22.4% being “high frailty risk” (assessed by HFRS), compared to 12.1% and 2.9% in the full  
193 sample. Logistic regression models for COVID-19 positivity showed that FI, HFRS, and CCI were  
194 all associated with higher risk of being COVID-19 positive, after adjusting for age and sex  
195 (**Appendix Table S6**).

196

### 197 *Frailty and comorbidity in predicting COVID-19 mortality*

198 In total, 408 individuals died of COVID-19 between 1<sup>st</sup> March and 24<sup>th</sup> August 2020. Results for  
199 the logistic regression models for COVID-19 mortality are presented in **Table 2**. In the full  
200 sample, when each of the measures – FI, HFRS, and CCI were tested separately, they were  
201 significantly associated with higher odds of COVID-19 mortality after controlling for age and  
202 sex (models 2–4). AUROC for the model including only age and sex was 0.76 (95% confidence  
203 interval [CI] 0.74–0.78); adding FI into the model resulted in a slightly larger AUROC of 0.78

204 (95% CI 0.76–0.80), while adding HFRS and CCI yielded significantly larger AUROCs of 0.83  
205 (95% CI 0.81–0.86) and 0.82 (95% CI 0.80–0.84) respectively (**Fig. 2A**). In the multivariable  
206 model with both frailty measures and the CCI included (model 5), HFRS (odds ratio [OR] 1.07;  
207 95% CI 1.06–1.07) and CCI (OR 1.14; 95% CI 1.08–1.20), but not FI, predicted statistically  
208 significantly higher risk of COVID-19 mortality. AUROC of the multivariable model (0.84; 95%  
209 CI 0.83–0.87) was similar to the age and sex-adjusted univariable models of HFRS and CCI (**Fig.**  
210 **2A**). After restricting the sample to COVID-19 positive individuals, all of these associations  
211 were attenuated, and the predictive accuracies were decreased. In the fully adjusted model  
212 (model 5), only CCI was marginally associated with COVID-19 mortality (OR 1.09; 95% CI 1.01–  
213 1.14). Frailty and comorbidity did not add predictive value on top of age and sex, as indicated  
214 by similar AUROCs across all models (**Fig. 2B**). We subsequently adjusted for ethnicity, smoking  
215 and socioeconomic variables in both samples; associations of frailty and comorbidity with  
216 COVID-19 mortality were not affected by these variables (**Appendix Table S7**).

217 In both samples, compared with older individuals ( $\geq 75$  years), relatively younger  
218 individuals ( $< 75$  years) had higher ORs for COVID-19 mortality across HFRS categories (**Fig. 3**);  
219 there was also significant interaction between HFRS and age in the COVID-19 positive sample  
220 ( $P_{\text{interaction}} < 0.001$ ), but not in the full sample (**Appendix Table S8**). We also tested the  
221 interaction between HFRS and sex, yet it was not statistically significant and thus we did not  
222 further perform subgroup analysis by sex.

223

#### 224 *Sensitivity analyses*

225 The predictive abilities of frailty and comorbidity for COVID-19 mortality were largely similar  
226 compared to the main analyses when (i) using FI and HFRS as categorical instead of continuous  
227 variables (**Appendix Table S9**), (ii) using the 2-year HFRS and CCI variables instead of the

228 original scores (**Appendix Table S10**), and (iii) accounting for competing risk by deaths due to  
229 other causes than COVID-19 (**Appendix Table S11**).

230

## 231 **Discussion**

232 Using data from the UK Biobank, we found that HFRS and CCI, measures of frailty and  
233 comorbidity respectively, were viable predictors of COVID-19 mortality and added predictive  
234 value on top of age and sex in the overall community population. The associations persisted  
235 even after adjusting for ethnicity, smoking and socioeconomic variables. Nonetheless, among  
236 COVID-19 positive individuals who were already more likely to be frail, HFRS and CCI did not  
237 improve predictive accuracy for COVID-19 mortality in addition to age and sex. Stronger  
238 associations between HFRS and COVID-19 mortality were seen among younger (<75 years)  
239 than older individuals ( $\geq 75$  years), indicating that the HFRS may be applicable for predicting  
240 mortality risk in younger adults as well.

241 To the best of our knowledge, this is the first study that has assessed the associations  
242 between frailty and COVID-19 mortality in the community population. We showed that frailty  
243 was associated with an elevated risk of COVID-19 mortality, and that a HFRS constructed  
244 based on ICD-10 codes was a stronger predictor than an FI calculated using self-reported data  
245 at baseline. The CCI, a measure of comorbidity computed by ICD-10 codes, likewise predicted  
246 COVID-19 mortality, which is in line with prior research showing a positive association  
247 between comorbidity and COVID-19 deaths [18,21,31]. Together, our results imply that frailty  
248 and comorbidity measures available in routinely collected medical records may be applied for  
249 risk stratification of COVID-19 mortality in the overall community population.

250 However, the predictive accuracies of frailty and comorbidity for COVID-19 mortality  
251 were reduced after restricting the sample to only those with the disease. It has been argued

252 that using non-random samples may induce selection bias in COVID-19-related studies [24]. In  
253 our COVID-19 positive sample, there was an over-representation of the most frail individuals,  
254 with even greater proportion of the “high frailty risk” group in our sample than in the cohort  
255 of older hospitalized individuals in the original HFRS study (22.1% vs 20.0%) [13]. Consistent  
256 with a previous study [32], we confirmed that frailty and comorbidities are determinants of  
257 being COVID-19 positive in the UK Biobank sample. Such over-representation of frailty may  
258 partly explain the inconsistencies in the frailty-mortality associations among hospitalized  
259 COVID-19 patients [16–22]. In a relatively frail sample, COVID-19 mortality risk may in fact be  
260 more related to other factors, such as viral load and host immune characteristics [20,33].  
261 Indeed, none of our models in the COVID-19 positive sample yielded a good predictive  
262 accuracy of AUROC>0.8, even when smoking, ethnicity and socioeconomic variables were  
263 included. More research is warranted to identify the most accurate predictors for mortality  
264 among COVID-19 patients.

265         Given that the HFRS was initially developed for older individuals, we stratified the  
266 analysis by age and observed a more pronounced association between HFRS and COVID-19  
267 mortality among the younger individuals (<75 years). A similar pattern has also been reported  
268 in the literature, in which frailty has shown to be more strongly associated with mortality at  
269 younger old ages than the oldest ages [9,25]. Our findings thus highlight the importance of  
270 frailty screening in younger individuals in prevention for COVID-19 related mortality.

271         The large sample of UK Biobank participants with linkage to COVID-19 data enabled us  
272 to study the associations among the overall population and to examine the potential effects  
273 of sample selection. Nevertheless, there are several caveats to this study. Firstly, demographic  
274 variables, socio-economic indicators and the deficits for construction of FI were assessed  
275 during baseline in 2006–2010. In particular, the FI, calculated by self-reported data ~10 years

276 ago, may not fully reflect participants' current physiological status. Future research may utilize  
277 an FI based on routine primary care data, such as the electronic FI [34], for assessing its  
278 predictive ability for COVID-19 mortality among the general population. Secondly, with the  
279 limitation of data availability, we were not able to retrieve test results and hospital inpatient  
280 data for people living in Scotland or Wales. Thirdly, during the earlier periods of the epidemic,  
281 COVID-19 testing in the UK was largely restricted to hospitalized individuals, who have more  
282 severe course of the diseases. As such, mild or asymptomatic COVID-19 cases may conceivably  
283 be missed, leading to an underestimation of COVID-19 positive cases. Fourthly, we modelled  
284 the outcome, COVID-19 mortality, as a binary variable rather than a time-to-event or survival  
285 outcome because we could not ascertain the exact date of confirmed COVID-19 infection for  
286 several individuals in the COVID-19 positive subsample. However, as the follow-up time was  
287 limited, it could be considered essentially complete for most participants (i.e., minimal  
288 censoring due to migration and other deaths). Finally, UK Biobank is not a nationally  
289 representative sample, with generally healthier and less socioeconomically deprived  
290 participants than the UK average [35], thereby reducing the generalizability of our findings.

291

## 292 **Conclusions and implications**

293 In conclusion, HFERS and CCI, measures of frailty and comorbidity respectively, constructed  
294 using routinely collected medical records, predicted COVID-19 mortality in the overall  
295 community sample and added predictive value on top age and sex. However, similar effects  
296 were not seen in those who already have the disease. Our findings suggest that identification  
297 of frail individuals in the general population may be a viable strategy for COVID-19 mortality  
298 risk stratification.

299 **Acknowledgements**

300 This research was conducted using the UK Biobank resource, as part of the registered project  
301 22224.

302

303 **Declarations**

304 **Funding:** This work was supported by the Swedish Research Council (2018-02077, 2019-  
305 01272), the Loo & Hans Osterman Foundation, the Strategic Research Program in  
306 Epidemiology at Karolinska Institutet and the Karolinska Institutet Foundations.

307 **Conflicts of interest:** The authors declare that they have no conflict of interest.

308 **Ethical approval:** Ethical approval for this study is covered by the general ethics review for the  
309 UK Biobank, conducted by North West Multi-Centre Research Ethics Committee (Reference:  
310 16/NW/0274, 13 May 2016).

311 **Consent to participate:** Informed consent was obtained from all individual participants  
312 included in the study.

313 **Consent to publish:** Not applicable.

314 **Availability of data and material:** UK Biobank is an open access resource. All bona fide  
315 researchers can apply to use its data for health-related research that is in the public interest  
316 (<http://www.ukbiobank.ac.uk/register-apply>).

317 **Code availability:** Not applicable.

318 **Authors' contributions:** J.K.L.M., R.K.-H., and J.J. contributed to the study concept and design;  
319 Y.W., S.H. and J.J. were responsible for acquisition of data; J.K.L.M., R.K.-H. and J.J. analysed  
320 and interpreted the data; J.K.L.M. and J.J. drafted the manuscript; R.K.-H., Y.W. and S.H.  
321 critically revised the manuscript for important intellectual content. All authors read and  
322 approved the final manuscript.

## 323 **References**

- 324 1. Dong E, Du H, Gardner L. An interactive web-based dashboard to track COVID-19 in real  
325 time. *Lancet Infect Dis.* 2020;20:533–4.
- 326 2. Zhou F, Yu T, Du R, Fan G, Liu Y, Liu Z, et al. Clinical course and risk factors for mortality of  
327 adult inpatients with COVID-19 in Wuhan, China: a retrospective cohort study. *Lancet.*  
328 2020;395:1054–62.
- 329 3. O’Dowd A. Covid-19: People in most deprived areas of England and Wales twice as likely to  
330 die. *BMJ.* 2020;369:m2389.
- 331 4. Albitar O, Ballouze R, Ooi JP, Sheikh Ghadzi SM. Risk factors for mortality among COVID-19  
332 patients. *Diabetes Res Clin Pract.* 2020;166:108293.
- 333 5. Lu L, Zhong W, Bian Z, Li Z, Zhang K, Liang B, et al. A comparison of mortality-related risk  
334 factors of COVID-19, SARS, and MERS: A systematic review and meta-analysis: Mortality-  
335 related risk factors of COVID-19, SARS, and MERS. *J. Infect.* 2020. p. e18.
- 336 6. Golestaneh L, Neugarten J, Fisher M, Billett HH, Gil MR, Johns T, et al. The association of  
337 race and COVID-19 mortality. *EClinicalMedicine.* 2020;25.
- 338 7. Clegg A, Young J, Iliffe S, Rikkert MO, Rockwood K. Frailty in elderly people. *Lancet.*  
339 2013;381:752–62.
- 340 8. Grabovac I, Haider S, Mogg C, Majewska B, Drgac D, Oberndorfer M, et al. Frailty Status  
341 Predicts All-Cause and Cause-Specific Mortality in Community Dwelling Older Adults. *J Am*  
342 *Med Dir Assoc.* 2019;20:1230-1235.e2.
- 343 9. Li X, Ploner A, Karlsson IK, Liu X, Magnusson PKE, Pedersen NL, et al. The frailty index is a  
344 predictor of cause-specific mortality independent of familial effects from midlife onwards: A  
345 large cohort study. *BMC Med.* 2019;17:94.
- 346 10. Williams DM, Jylhävä J, Pedersen NL, Hägg S. A Frailty Index for UK Biobank Participants.

- 347 Journals Gerontol - Ser A Biol Sci Med Sci. 2019;74:582–7.
- 348 11. Rockwood K, Song X, MacKnight C, Bergman H, Hogan DB, McDowell I, et al. A global  
349 clinical measure of fitness and frailty in elderly people. *CMAJ*. 2005;173:489–95.
- 350 12. Searle SD, Mitnitski A, Gahbauer EA, Gill TM, Rockwood K. A standard procedure for  
351 creating a frailty index. *BMC Geriatr*. 2008;8:24.
- 352 13. Gilbert T, Neuburger J, Kraindler J, Keeble E, Smith P, Ariti C, et al. Development and  
353 validation of a Hospital Frailty Risk Score focusing on older people in acute care settings using  
354 electronic hospital records: an observational study. *Lancet*. 2018;391:1775–82.
- 355 14. Kundi H, Wadhera RK, Strom JB, Valsdottir LR, Shen C, Kazi DS, et al. Association of Frailty  
356 with 30-Day Outcomes for Acute Myocardial Infarction, Heart Failure, and Pneumonia among  
357 Elderly Adults. *JAMA Cardiol*. 2019;4:1084–91.
- 358 15. McAlister F, Van Walraven C. External validation of the Hospital Frailty Risk Score and  
359 comparison with the Hospital-patient One-year Mortality Risk Score to predict outcomes in  
360 elderly hospitalised patients: A retrospective cohort study. *BMJ Qual Saf*. 2019;28:284–8.
- 361 16. Hewitt J, Carter B, Vilches-Moraga A, Quinn TJ, Braude P, Verduri A, et al. The effect of  
362 frailty on survival in patients with COVID-19 (COPE): a multicentre, European, observational  
363 cohort study. *Lancet Public Heal*. 2020;5:e444–51.
- 364 17. Aw D, Woodrow L, Ogliari G, Harwood R. Association of Frailty with Mortality in Older  
365 Inpatients with Covid-19: A Cohort Study. *Age Ageing*. 2020;1–8.
- 366 18. Hägg S, Jylhävä J, Wang Y, Xu H, Metzner C, Annetorp M, et al. Age, frailty and comorbidity  
367 as prognostic factors for short-term outcomes in patients with COVID-19 in geriatric care. *J*  
368 *Am Med Dir Assoc*. 2020;0.
- 369 19. Kundi H, Çetin EHÖ, Canpolat U, Aras S, Celik O, Ata N, et al. The role of Frailty on Adverse  
370 Outcomes Among Older Patients with COVID-19. *J Infect*. 2020;



- 371 20. De Smet R, Mellaerts B, Vandewinckele H, Lybeert P, Frans E, Ombelet S, et al. Frailty and  
372 Mortality in Hospitalized Older Adults With COVID-19: Retrospective Observational Study. *J*  
373 *Am Med Dir Assoc.* 2020;21:928-932.e1.
- 374 21. Owen RK, Conroy SP, Taub N, Jones W, Bryden D, Pareek M, et al. Comparing associations  
375 between frailty and mortality in hospitalised older adults with or without COVID-19 infection:  
376 a retrospective observational study using electronic health records. *Age Ageing.* 2020;1.
- 377 22. Miles A, Webb TE, Mcloughlin BC, Mannan I, Rather A, Knopp P, et al. Outcomes from  
378 COVID-19 across the range of frailty: excess mortality in fitter older people. *Eur Geriatr Med.*  
379 2020;1:3.
- 380 23. Collins JT, Short R, Carter B, Verduri A, Myint PK, Quinn TJ, et al. The Clinical Frailty Scale:  
381 Estimating the Prevalence of Frailty in Older Patients Hospitalised with COVID-19. *The COPE*  
382 *Study. Geriatr (Basel, Switzerland).* 2020;5.
- 383 24. Griffith G, Morris TT, Tudball M, Herbert A, Mancano G, Pike L, et al. Collider bias  
384 undermines our understanding of COVID-19 disease risk and severity. *medRxiv.*  
385 2020;2020.05.04.20090506. Available from: <https://doi.org/10.1101/2020.05.04.20090506>
- 386 25. Tran DTT, Tu J V., Dupuis JY, Eddeen AB, Sun LY. Association of frailty and long-term survival  
387 in patients undergoing coronary artery bypass grafting. *J Am Heart Assoc.* 2018;7.
- 388 26. Sudlow C, Gallacher J, Allen N, Beral V, Burton P, Danesh J, et al. UK Biobank: An Open  
389 Access Resource for Identifying the Causes of a Wide Range of Complex Diseases of Middle  
390 and Old Age. 2015;12:e1001779.
- 391 27. Armstrong J, Rudkin JK, Allen N, Crook DW, Wilson DJ, Wyllie DH, et al. Dynamic linkage of  
392 covid-19 test results between public health england's second generation surveillance system  
393 and uk biobank. *Microb Genomics.* 2020;6:1–9.
- 394 28. Rockwood K, Song X, Mitnitski A. Changes in relative fitness and frailty across the adult

- 395 lifespan: Evidence from the Canadian National Population Health Survey. *CMAJ*.  
396 2011;183:E487-94.
- 397 29. Charlson ME, Pompei P, Ales KL, MacKenzie CR. A new method of classifying prognostic  
398 comorbidity in longitudinal studies: Development and validation. *J Chronic Dis*. 1987;40:373–  
399 83.
- 400 30. Benjamini Y, Hochberg Y. Controlling the False Discovery Rate: A Practical and Powerful  
401 Approach to Multiple Testing. *J R Stat Soc Ser B*. 1995;57:289–300.
- 402 31. Atkins JL, Masoli JAH, Delgado J, Pilling LC, Kuo C-L, Kuchel GA, et al. Preexisting  
403 Comorbidities Predicting COVID-19 and Mortality in the UK Biobank Community Cohort.  
404 *Journals Gerontol Ser A*. 2020;75:2224–30.
- 405 32. Woolford SJ, D’Angelo S, Curtis EM, Parsons CM, Ward KA, Dennison EM, et al. COVID-19  
406 and associations with frailty and multimorbidity: a prospective analysis of UK Biobank  
407 participants. *Aging Clin Exp Res*. 2020;32:1897–905.
- 408 33. Ji D, Zhang D, Xu J, Chen Z, Yang T, Zhao P, et al. Prediction for Progression Risk in Patients  
409 With COVID-19 Pneumonia: The CALL Score. *Clin Infect Dis*. 2020;71:1393–9.
- 410 34. Clegg A, Bates C, Young J, Ryan R, Nichols L, Ann Teale E, et al. Development and validation  
411 of an electronic frailty index using routine primary care electronic health record data. *Age*  
412 *Ageing*. 2016;45:353–60.
- 413 35. Fry A, Littlejohns TJ, Sudlow C, Doherty N, Adamska L, Sprosen T, et al. Comparison of  
414 Sociodemographic and Health-Related Characteristics of UK Biobank Participants with Those  
415 of the General Population. *Am J Epidemiol*. 2017;186:1026–34.

## Tables and Figures

**Table 1** Characteristics of UK Biobank participants in the full sample and COVID-19 positive sample

|                                             | Full sample<br>( <i>n</i> =437,555) | COVID-19 positive sample<br>( <i>n</i> =2,059) |
|---------------------------------------------|-------------------------------------|------------------------------------------------|
| Deaths, <i>n</i> (%)                        | 2,146 (0.5)                         | 477 (23.2)                                     |
| Age (years), mean ± SD                      | 68.1 ± 8.1                          | 68.8 ± 9.0                                     |
| Sex, <i>n</i> (%)                           |                                     |                                                |
| Women                                       | 241,791 (55.3)                      | 976 (47.4)                                     |
| Men                                         | 195,764 (44.7)                      | 1,083 (52.6)                                   |
| Ethnicity, <i>n</i> (%)                     |                                     |                                                |
| White                                       | 411,094 (94.3)                      | 1,798 (87.7)                                   |
| Asian                                       | 10,471 (2.4)                        | 94 (4.6)                                       |
| Black                                       | 7,608 (1.7)                         | 102 (5.0)                                      |
| Others                                      | 6,886 (1.6)                         | 57 (2.8)                                       |
| Smoking status, <i>n</i> (%)                |                                     |                                                |
| Never                                       | 242,414 (55.6)                      | 981 (48.0)                                     |
| Previous                                    | 150,245 (34.5)                      | 806 (39.5)                                     |
| Current                                     | 43,346 (9.9)                        | 256 (12.5)                                     |
| Education, <i>n</i> (%)                     |                                     |                                                |
| Low                                         | 70,461 (16.4)                       | 512 (25.6)                                     |
| Intermediate                                | 218,540 (50.9)                      | 999 (50.0)                                     |
| High                                        | 140,713 (32.8)                      | 489 (24.5)                                     |
| Income, <i>n</i> (%)                        |                                     |                                                |
| <£18,000                                    | 81,674 (22.0)                       | 564 (33.5)                                     |
| £18,000–30,999                              | 94,319 (25.4)                       | 438 (26.0)                                     |
| £31,000–51,999                              | 98,079 (26.4)                       | 372 (22.1)                                     |
| ≥£52,000                                    | 97,456 (26.3)                       | 311 (18.5)                                     |
| Townsend deprivation quintile, <i>n</i> (%) |                                     |                                                |
| 1 (least deprived)                          | 87,712 (20.1)                       | 291 (14.1)                                     |
| 2                                           | 88,844 (20.3)                       | 334 (16.2)                                     |
| 3                                           | 88,525 (20.3)                       | 375 (18.2)                                     |
| 4                                           | 87,596 (20.0)                       | 431 (20.9)                                     |
| 5 (most deprived)                           | 84,352 (19.3)                       | 627 (30.5)                                     |
| Frailty Index, median (IQR)                 | 0.112 (0.066–0.163)                 | 0.133 (0.083–0.199)                            |
| By category, <i>n</i> (%):                  |                                     |                                                |
| Relatively fit (≤0.03)                      | 26,412 (6.0)                        | 78 (3.8)                                       |
| Less fit (>0.03–0.1)                        | 164,761 (37.7)                      | 604 (29.3)                                     |
| Least fit (>0.1–0.21)                       | 193,409 (44.2)                      | 933 (45.3)                                     |
| Frail (>0.21)                               | 52,973 (12.1)                       | 444 (21.6)                                     |
| Hospital Frailty Risk Score, median (IQR)   | 0.7 (0–3.2)                         | 3.2 (0–12.9)                                   |
| By category, <i>n</i> (%):                  |                                     |                                                |
| Low risk (<5)                               | 365,958 (83.6)                      | 1,196 (58.1)                                   |
| Intermediate risk (5–15)                    | 59,046 (13.5)                       | 402 (19.5)                                     |
| High risk (>15)                             | 12,551 (2.9)                        | 461 (22.4)                                     |
| Charlson Comorbidity Index, median (IQR)    | 0 (0–1)                             | 1 (0–3)                                        |

IQR, interquartile range; SD, standard deviation

**Table 2** Logistic regression models for the associations of age, sex, frailty and comorbidity with COVID-19 mortality in the full sample and COVID-19 positive sample

|                                               | Model 1:<br>age + sex<br>OR (95% CI) | Model 2:<br>FI + age + sex<br>OR (95% CI) | Model 3:<br>HFRS + age + sex<br>OR (95% CI) | Model 4:<br>CCI + age + sex<br>OR (95% CI) | Model 5:<br>Multivariable<br>OR (95% CI) |
|-----------------------------------------------|--------------------------------------|-------------------------------------------|---------------------------------------------|--------------------------------------------|------------------------------------------|
| <b>(a) Full sample (n=437,555)</b>            |                                      |                                           |                                             |                                            |                                          |
| Age                                           | 1.14 (1.12–1.16)*                    | 1.13 (1.11–1.15)*                         | 1.11 (1.09–1.13)*                           | 1.11 (1.09–1.13)*                          | 1.10 (1.09–1.12)*                        |
| Male sex                                      | 1.99 (1.63–2.44)*                    | 2.12 (1.73–2.59)*                         | 1.93 (1.57–2.36)*                           | 1.77 (1.45–2.17)*                          | 1.86 (1.52–2.29)*                        |
| FI (per 10% increase)                         |                                      | 1.70 (1.52–1.90)*                         |                                             |                                            | 1.09 (0.96–1.23)                         |
| HFRS                                          |                                      |                                           | 1.08 (1.07–1.09)*                           |                                            | 1.07 (1.06–1.07)*                        |
| CCI                                           |                                      |                                           |                                             | 1.40 (1.35–1.45)*                          | 1.14 (1.08–1.20)*                        |
| Area under the ROC curve                      | 0.76 (0.74–0.78)                     | 0.78 (0.76–0.80)                          | 0.83 (0.81–0.86)                            | 0.82 (0.80–0.84)                           | 0.84 (0.83–0.87)                         |
| <b>(b) COVID-19 positive sample (n=2,059)</b> |                                      |                                           |                                             |                                            |                                          |
| Age                                           | 1.12 (1.10–1.14)*                    | 1.12 (1.10–1.14)*                         | 1.11 (1.09–1.13)*                           | 1.11 (1.10–1.13)*                          | 1.11 (1.09–1.13)*                        |
| Male sex                                      | 1.45 (1.14–1.83)*                    | 1.47 (1.16–1.87)*                         | 1.44 (1.14–1.83)*                           | 1.43 (1.13–1.81)*                          | 1.43 (1.12–1.81)*                        |
| FI (per 10% increase)                         |                                      | 1.09 (0.96–1.25)                          |                                             |                                            | 1.00 (0.87–1.15)                         |
| HFRS                                          |                                      |                                           | 1.01 (1.00–1.02)*                           |                                            | 1.01 (1.00–1.01)                         |
| CCI                                           |                                      |                                           |                                             | 1.09 (1.04–1.15)*                          | 1.09 (1.01–1.14)*                        |
| Area under the ROC curve                      | 0.74 (0.72–0.77)                     | 0.74 (0.72–0.77)                          | 0.75 (0.72–0.77)                            | 0.75 (0.72–0.77)                           | 0.75 (0.72–0.77)                         |

CCI, Charlson comorbidity index; CI, confidence interval; FI, Frailty Index; HFRS, Hospital Frailty Risk Score; OR, odds ratio; ROC, receiver operating characteristic curve.

\*Significant with a false discovery rate corrected significance level at 0.044

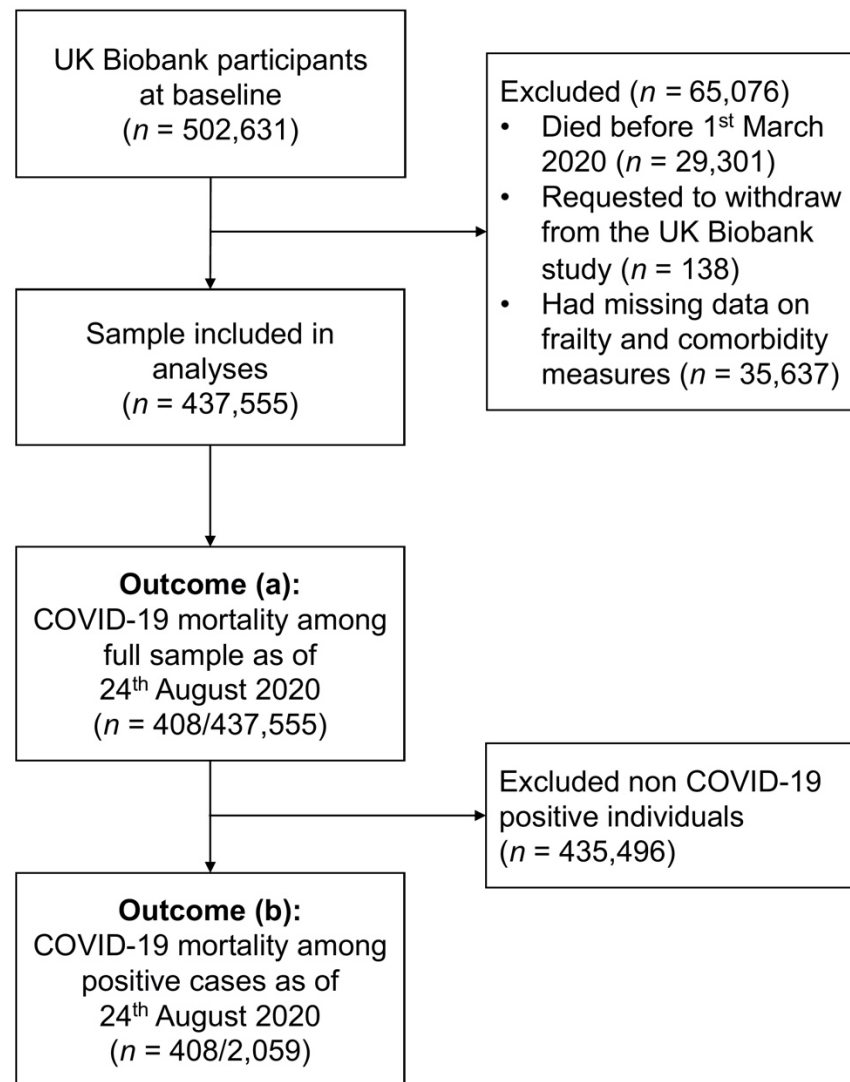

**Fig. 1** Flowchart of selection of study sample from the UK Biobank

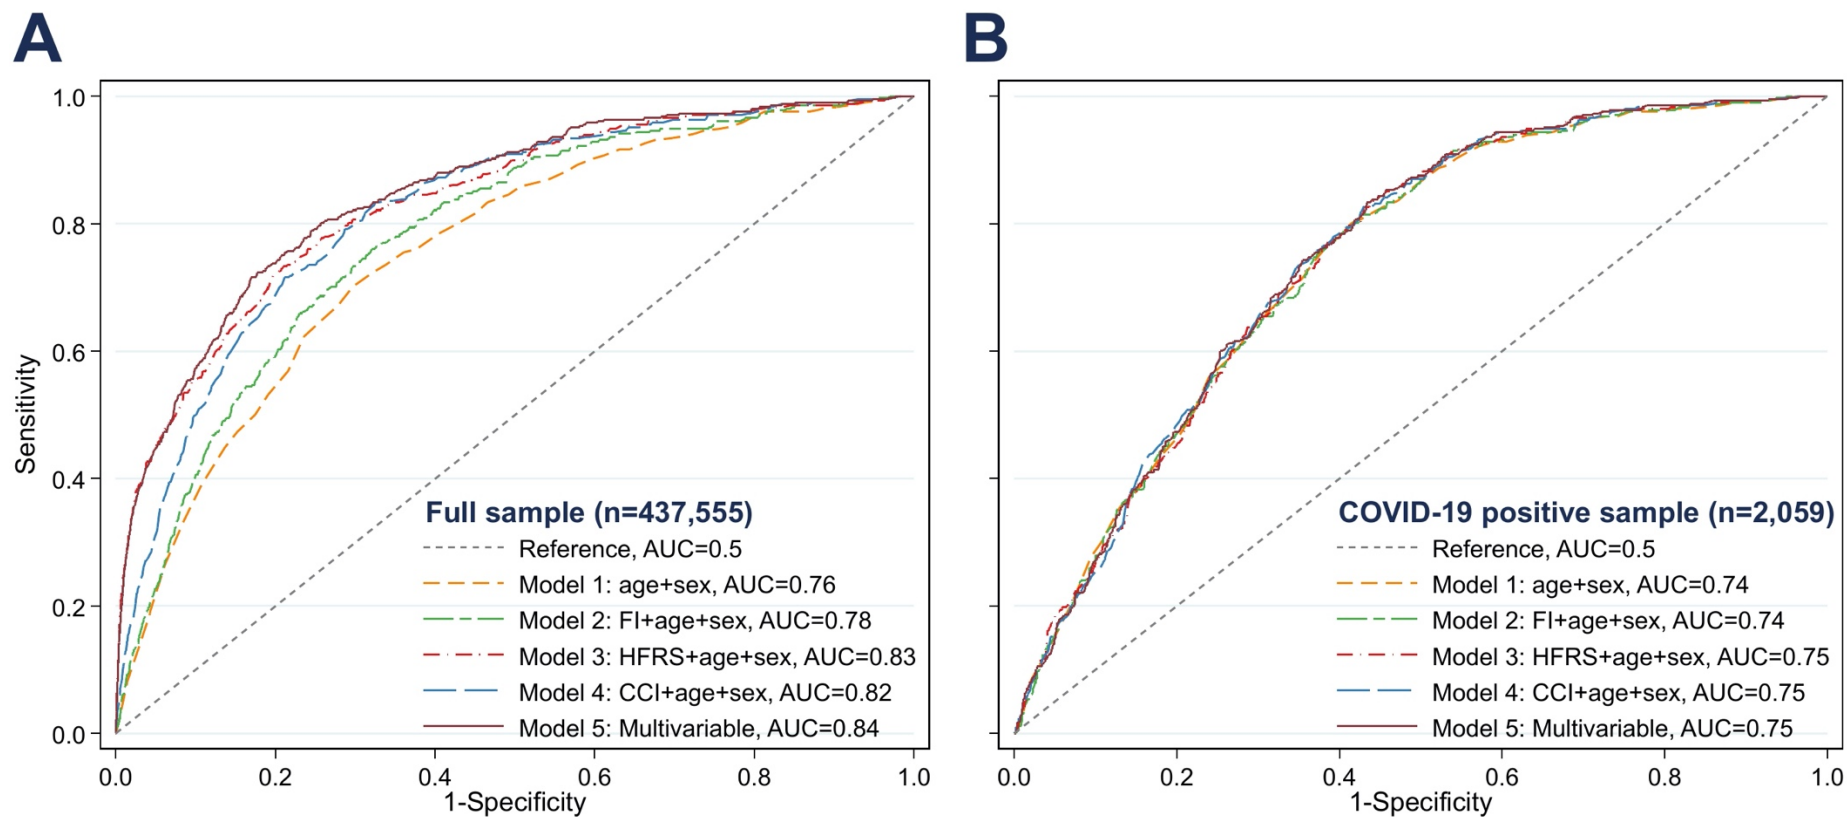

**Fig. 2** Receiver operating characteristic (ROC) curves for age, sex, frailty and comorbidity in predicting COVID-19 mortality. **(A)** Analyses performed in the full UK Biobank sample ( $n=437,555$ ); **(B)** analyses performed in the COVID-19 positive sample ( $n=2,059$ ). Model 1 to model 4 are univariable logistic regression models adjusted for age and sex, while model 5 is the multivariable logistic regression model. AUC, area under the receiver operating characteristic curves; CCI, Charlson comorbidity index; FI, Frailty Index; HFRS, Hospital Frailty Risk Score

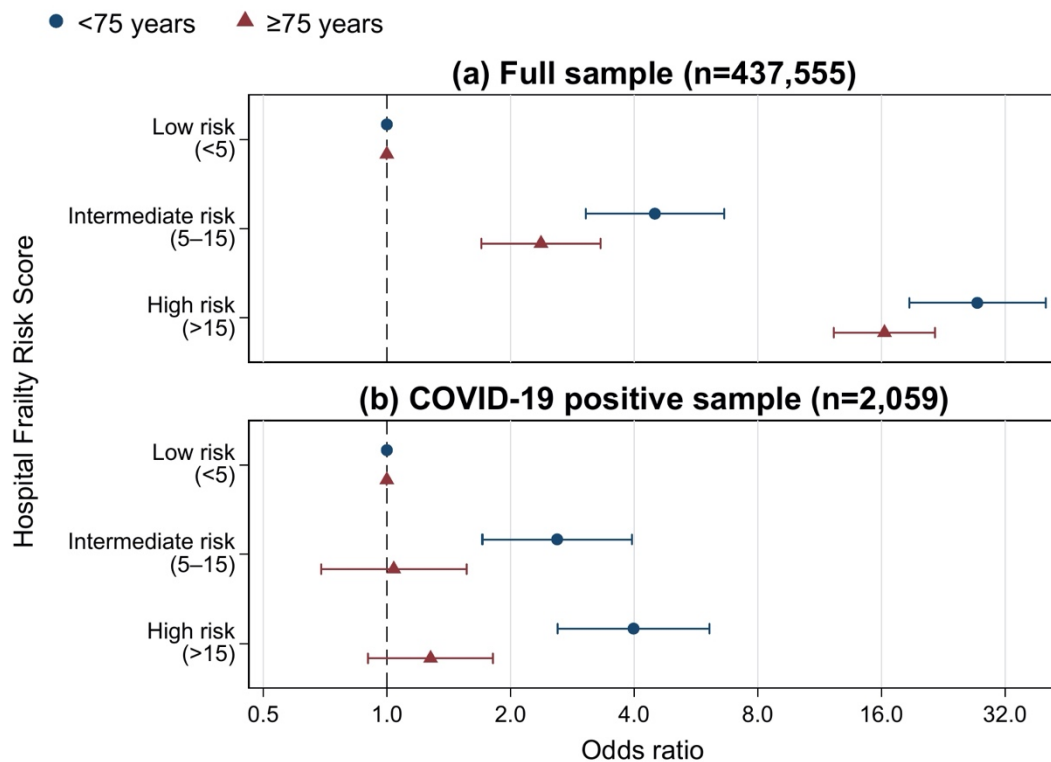

**Fig. 3** Associations between Hospital Frailty Risk Score and COVID-19 mortality stratified by age into younger (<75 years) and older (≥75 years) individuals in full sample ( $n=437,555$ ) and in COVID-19 positive sample ( $n=2,059$ ). Error bars indicate 95% confidence intervals. Models were adjusted for sex.

*Note:* The point estimates for the stratified analysis can be found in *Appendix Table S8*
